# Supplementary material for: Rapid Degradation of SARS-CoV-2 Spike S Protein by A Specific Serine Protease
Source: MDPI journal article supplement (doi:10.3390/molecules27061882), 2022-03-14
Supplement: s1 [file s1]

**Supplement Table S1. Comparison of the structural characteristics of SARS-CoV-2 wild and variants and the prediction of the effect of ASPNJ on S protein**

|              |                              | 1                                                                                                 | 2                                                                | 3                                                                                                                  | 4                                                                                       | 5                                                                                                                                                                                                                            | 6                                                                                             | 7                                                                          |                                              |
|--------------|------------------------------|---------------------------------------------------------------------------------------------------|------------------------------------------------------------------|--------------------------------------------------------------------------------------------------------------------|-----------------------------------------------------------------------------------------|------------------------------------------------------------------------------------------------------------------------------------------------------------------------------------------------------------------------------|-----------------------------------------------------------------------------------------------|----------------------------------------------------------------------------|----------------------------------------------|
| WHO<br>PANGO | Wild<br>wild                 | Alpha<br>B.1.1.7                                                                                  | Beta<br>B.1.351                                                  | Gamma<br>P.1                                                                                                       | Delta<br>B.1.617.2                                                                      | Omicron<br>BA.1                                                                                                                                                                                                              | Lambda<br>C.37                                                                                | Mu<br>B.1.621                                                              |                                              |
| S            | aa mutations of<br>S protein | del69/70(HV),<br>del144(Y),<br>N501Y,<br>A570D,<br>D614G,<br>P681H,<br>T716I,<br>S982A,<br>D1118H | D80A,<br>D215G,<br>K417N,<br>E484K,<br>N501Y,<br>D614G,<br>A701V | L18F,<br>T20N,<br>P26S,<br>D138Y,<br>R190S,<br>K417T,<br>E484K,<br>N501Y,<br>D614G,<br>H655Y,<br>T1027I,<br>V1176F | T19R,<br>E156G,<br>del157/158<br>(FR),<br>L452R,<br>T478K,<br>D614G,<br>P681R,<br>D950N | A67V,del69/70(HV),T95I,G142D,<br>del143/145(VYY),N211I,del212/212(L),<br>ins214(EPE),G339D,S371L,S373P,S375F,<br>Q493R,G496S,Q498R,N501Y,Y505H,T547K<br>,D614G,H655Y,N679K,P681H,N764K,<br>D796Y,N856K,Q954H,<br>N969K,L981F | G75V,<br>T76I,<br>R246N,<br>del247/253 ,<br>(SYLTPGD)<br>L452Q,<br>F490S,<br>D614G,<br>T859N, | T95I,<br>Y145N,<br>R346K,<br>E484K,<br>N501Y,<br>D614G,<br>P681H,<br>D950N |                                              |
|              | aa length/pI                 | 1261/6.23                                                                                         | 1258/6.35                                                        | 1261/6.63                                                                                                          | 1261/6.38                                                                               | 1259/6.93                                                                                                                                                                                                                    | 1258/6.79                                                                                     | 1254/6.32                                                                  | 1261/6.66                                    |
|              | No. of K/R                   | 61/42                                                                                             | 61/42                                                            | 61/42                                                                                                              | 61/41                                                                                   | 62/44                                                                                                                                                                                                                        | 66/44                                                                                         | 61/41                                                                      | 63/41                                        |
|              | No. of CS/<br>No. of NCS     | 101/2                                                                                             | 101/2                                                            | 101/2                                                                                                              | 100/2                                                                                   | 102/4                                                                                                                                                                                                                        | 107/3                                                                                         | 100/2                                                                      | 102/2                                        |
|              | PNCS                         | 462(*450) <b>KP</b> ,<br>811(*799) <b>KP</b>                                                      | 462(*447) <b>KP</b> ,<br>811(*796) <b>KP</b>                     | 462(*450) <b>KP</b> ,<br>811(*799) <b>KP</b>                                                                       | 462(*450) <b>KP</b> ,<br>811(*799) <b>KP</b>                                            | 462(*448) <b>KP</b> ,<br>478(*464) <b>KP</b> ,<br>682(*668) <b>RR</b><br>811(*797) <b>KP</b>                                                                                                                                 | 462(*447) <b>KP</b> ,<br>498(*483) <b>RP</b> ,<br>811(*796) <b>KP</b>                         | 462(*443) <b>KP</b> ,<br>811(*792) <b>KP</b>                               | 462(*450) <b>KP</b> ,<br>811(*799) <b>KP</b> |
| S1           | aa length/pI                 | 673/8.24                                                                                          | 670 / 8.24                                                       | 673/8.59                                                                                                           | 673/8.43                                                                                | 671/8.65                                                                                                                                                                                                                     | 670/8.35                                                                                      | 666/8.35                                                                   | 673/8.51                                     |
|              | No. of K/R                   | 30/29                                                                                             | 30/29                                                            | 30/29                                                                                                              | 30/28                                                                                   | 31/31                                                                                                                                                                                                                        | 32/31                                                                                         | 30/28                                                                      | 32/28                                        |
|              | No. of CS/<br>No. of NCS     | 58/1                                                                                              | 58/1                                                             | 58/1                                                                                                               | 57/1                                                                                    | 59/2                                                                                                                                                                                                                         | 61/2                                                                                          | 57/1                                                                       | 59/1                                         |
|              | C terminal                   | 669PRRAR                                                                                          | 666HRRAR                                                         | 669PRRAR                                                                                                           | 669PRRAR                                                                                | 667RRRAR                                                                                                                                                                                                                     | 666HRRAR                                                                                      | 662PRRAR                                                                   | 669HRRAR                                     |
| RBD          | aa length/pI                 | 223/8.91                                                                                          | 223/8.90                                                         | 223/9.00                                                                                                           | 223/9.00                                                                                | 223/9.09                                                                                                                                                                                                                     | 223/9.01                                                                                      | 223/8.91                                                                   | 223/9.07                                     |
|              | No. of K/R                   | 12/11                                                                                             | 12/11                                                            | 12/11                                                                                                              | 12/11                                                                                   | 13/12                                                                                                                                                                                                                        | 12/13                                                                                         | 12/11                                                                      | 14/10                                        |
|              | No. of CS/<br>No. of NCS     | 22/1                                                                                              | 22/1                                                             | 22/1                                                                                                               | 22/1                                                                                    | 23/2                                                                                                                                                                                                                         | 23/2                                                                                          | 22/1                                                                       | 23/1                                         |
| S2           | aa length/pI                 | 588/5.25                                                                                          | 588/5.39                                                         | 588/5.25                                                                                                           | 588/5.25                                                                                | 588/5.32                                                                                                                                                                                                                     | 588/5.58                                                                                      | 588/5.25                                                                   | 588/5.32                                     |
|              | No. of K/R                   | 31/13                                                                                             | 31/13                                                            | 31/13                                                                                                              | 31/13                                                                                   | 31/13                                                                                                                                                                                                                        | 34/13                                                                                         | 31/13                                                                      | 31/13                                        |
|              | No. of CS/<br>No. of NCS     | 43/1                                                                                              | 43/1                                                             | 43/1                                                                                                               | 43/1                                                                                    | 43/1                                                                                                                                                                                                                         | 46/1                                                                                          | 43/1                                                                       | 43/1                                         |

Columns 1-5 are Variants of Concern (VOC), and columns 6,7 are Variants of Interest (VOI) according to the WHO (World Health Organization) and PANGO (Phylogenetic assignment of the named global outbreak). S: Spike glycoprotein, S1: S1 protein, RBD: receptor binding domain. Amino acids (aa) in bold letters such as 462**KP** and 682**RR** indicate that they cannot be hydrolyzed by trypsin. No. of CS: theoretical No. of cleavage sites (CS) by trypsin; No. of NCS: theoretical No. of non-cleavage sites (NCS) by trypsin. PNCS: Trypsin's

theoretical position of NCS in S, S1 and RBD. \*: The position of NCS in the mature sequence of S, S1 and RBD without signal peptide. No. of K/R: numbers of Lysine / number of Arginine. The c-terminal sequence RRAR of S1 protein, called CendR, can be hydrolyzed by trypsin, causing the c-terminal of S1 protein to fail to bind and activate neuropilin receptors (NRP1 and NRP2). The aa sequence data of S, S1 and RBD were quoted from <https://www.uniprot.org/>, <https://cov-lineages.org> and <https://outbreak.inf>. The pI, No. of CS and NCS by trypsin were calculated using [https://web.expasy.org/compute\\_pi/](https://web.expasy.org/compute_pi/) and [https://web.expasy.org/peptide\\_cutter/](https://web.expasy.org/peptide_cutter/). Trypsin preferentially cleaves the carbonyl side of arginine or lysine. Since this catalytic specificity is also shared by ASPNJ, this table predicts CS etc. using trypsin.
